# Supplementary material
Source: PubMed Central journal article supplement (PMC3647990)
Supplement: IAI.00050-13_zii999090122so1.pdf [file IAI.00050-13_zii999090122so1.pdf]

**Study of the response regulator Rrp1 reveals its regulatory role on chitobiose utilization  
and virulence of *Borrelia burgdorferi***

Ching Woon Sze<sup>1</sup>, Alexis Smith<sup>3</sup>, Young Hee Choi<sup>2</sup>, Xiuli Yang<sup>3</sup>, Utpal Pal<sup>3</sup>, Aiming Yu<sup>2</sup>, and  
Chunhao Li<sup>1\*</sup>

*Department of Oral Biology, The State University of New York at Buffalo, Buffalo, New York<sup>1</sup>,*

*Department of Pharmaceutical Sciences, The State University of New York at Buffalo, Buffalo, New  
York<sup>2</sup>,*

*Department of Veterinary Medicine, University of Maryland and Virginia-Maryland Regional College  
of Veterinary Medicine, College Park, Maryland<sup>3</sup>*

Running title: Regulation of chitobiose utilization in *Borrelia burgdorferi*

Key words: Lyme disease/ *Borrelia burgdorferi*/ chitobiose/ Rrp1/ c-di-GMP/ BosR-RpoN-RpoS

\* Corresponding author. Mailing address: Department of Oral Biology, SUNY at Buffalo, 3435 Main  
St., Buffalo, NY 14214-3092

Electronic mail address: cli9@buffalo.edu; phone: (716) 829-6014; Fax: (716)-829-3942

**Table S1. Oligonucleotide primers used in this study.**

| Primer          | Description                                                        | Sequences                                                 |
|-----------------|--------------------------------------------------------------------|-----------------------------------------------------------|
| P <sub>1</sub>  | mutagenesis of <i>bb0419</i> (F)                                   | 5'-GAAGCAGAGAATCAGAAGC-3'                                 |
| P <sub>2</sub>  | mutagenesis of <i>bb0419</i> (R)                                   | 5'-CCTTTAACACTTGGCCTTC-3'                                 |
| P <sub>3</sub>  | Kan (F)                                                            | 5'- <u>TCTAGATA</u> AATACCCGAGCTTCAAG-3'                  |
| P <sub>4</sub>  | Kan (R)                                                            | 5'- <u>TGGCCATTAGAAAA</u> ACTCATCGAGC-3'                  |
| P <sub>5</sub>  | complementation, upstream<br>of <i>bb0420</i> (F)                  | 5'- <u>GGATCCTTGTAAAA</u> ACCCTGGTGG-3'                   |
| P <sub>6</sub>  | complementation, upstream<br>of <i>bb0420</i> (R)                  | 5'-CTTTAATTATCATTTCACGTTATTTT<br>AAAATTCCT-3'             |
| P <sub>7</sub>  | complementation, <i>bb0419</i> (F)                                 | 5'-AGGGAATTTTAAAATAACGTGGAAAT<br>GATAATTAAAG-3'           |
| P <sub>8</sub>  | complementation, <i>bb0419</i> (R)                                 | 5'- <u>GGATCCTTAATATCTAA</u> ACTGATTTTC-3'                |
| P <sub>9</sub>  | pCisCom 5' arm (F)                                                 | 5'-ATGGGTGTTTTAGATAAGATTAAAC-3'                           |
| P <sub>10</sub> | pCisCom 5' arm (R)                                                 | 5'- <u>CCATGG TCTAGATTA</u> ATTTCTATTA<br>ATATTATTAAG-3'  |
| P <sub>11</sub> | pCisCom 3' arm (F)                                                 | 5'- <u>CCATGGT</u> TAATTGTCACCATCAAC-3'                   |
| P <sub>12</sub> | pCisCom 3' arm (R)                                                 | 5'- ATGTTTAAAGTTATCAAATG-3'                               |
| P <sub>13</sub> | <i>aacC1</i> (F)                                                   | 5'- <u>TCTAGA GGATCC CTGCAGTA</u> ATAC<br>CCGAGCTTCAAG-3' |
| P <sub>14</sub> | <i>aacC1</i> (R)                                                   | 5'- <u>GAATTC CCATGGT</u> TAGGTGGCGGT<br>ACTTGGGTC-3'     |
| P <sub>15</sub> | <i>chbC</i> rescue in <i>rrp1<sup>mut</sup></i> , <i>flgBp</i> (F) | 5'- <u>GCATGCTACCCGAGCTT</u> CAAGGAAG-3'                  |

|                 |                                                                    |                                                       |
|-----------------|--------------------------------------------------------------------|-------------------------------------------------------|
| P <sub>16</sub> | <i>chbC</i> rescue in <i>rrp1<sup>mut</sup></i> , <i>flgBp</i> (R) | 5'- <u>CATATGATGGAAACCTCCCTCATT</u> TA-3'             |
| P <sub>17</sub> | <i>chbC</i> rescue in <i>rrp1<sup>mut</sup></i> , <i>chbC</i> (F)  | 5'- <u>CATATGATGAATTTTCAAGATTTTATT</u><br>GAAACTAC-3' |
| P <sub>18</sub> | <i>chbC</i> rescue in <i>rrp1<sup>mut</sup></i> , <i>chbC</i> (R)  | 5'- <u>GCATGCCTATTCTTTTTCTGCAAAAAG</u> -3'            |
| P <sub>19</sub> | qRT-PCR, <i>rpoS</i> (F)                                           | 5'-ACCTATCTCCTGCTCAGTATATAA-3'                        |
| P <sub>20</sub> | qRT-PCR, <i>rpoS</i> (R)                                           | 5'-CAAGGGTAATTTTCAGGGTTAAAAG-3'                       |
| P <sub>21</sub> | qRT-PCR, <i>bbb04</i> (F)                                          | 5'-GCTGGACAATCAGATTGGATAC-3'                          |
| P <sub>22</sub> | qRT-PCR, <i>bbb04</i> (R)                                          | 5'-TCCTAAAGAACTTTGAATAGCA-3'                          |
| P <sub>23</sub> | qRT-PCR, <i>bosR</i> (F)                                           | 5'-CCTGTATTATTGAAAAATTTAACAT<br>CAG-3'                |
| P <sub>24</sub> | qRT-PCR, <i>bosR</i> (R)                                           | 5'-GACTTGATTGCATTTATTGCAT-3'                          |
| P <sub>25</sub> | qRT-PCR, <i>flaB</i> (F)                                           | 5'-CCCTGAAAGTGATGCTGGTGTG-3'                          |
| P <sub>26</sub> | qRT-PCR, <i>flaB</i> (R)                                           | 5'-CATATTCAGATGCAGACAGAGG-3'                          |

The underlined sequences are the engineered restriction cut sites for DNA cloning.

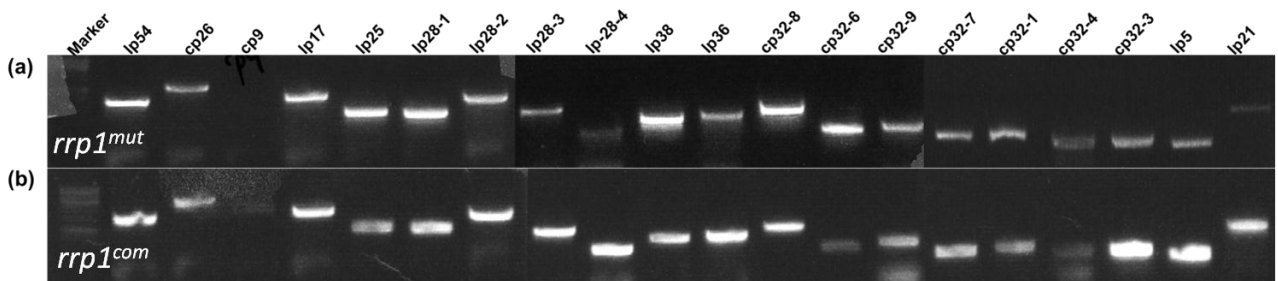

**Fig.S1. Detection of plasmid contents in *rrp1<sup>mut</sup>* (a) and *rrp1<sup>com</sup>* (b) strains by PCR.** The primers for PCR were described as before (1). The parental strain A3-68 lacks lp56 (2).

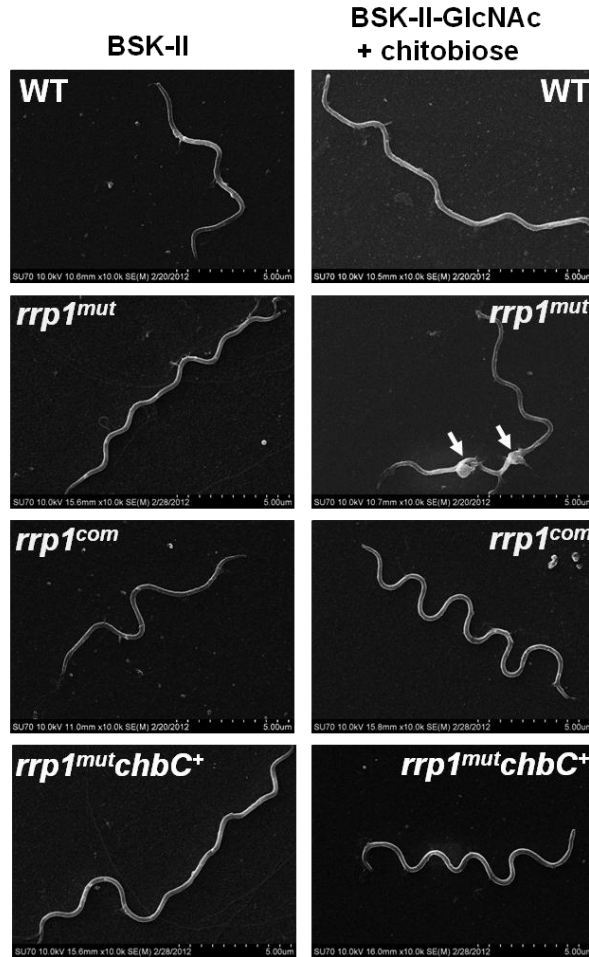

**Fig.S2. Scanning electron microscope analysis.** The wild type (WT), *rrp1<sup>mut</sup>*, *rrp1<sup>com</sup>*, and *rrp1<sup>mut</sup>chbC<sup>+</sup>* strains were cultured in both normal BSK-II medium (left panel) and BSK-II – GlcNAc + chitobiose medium (right panel). Stationary phase cells (Day 8) were subjected to scanning electron microscope analysis. Arrows point to membrane blebs.

#### Reference List

1. **Elias AF, Stewart PE, Grimm D, Caimano MJ, Eggers CH, Tilly K, Bono JL, Akins DR, Radolf JD, Schwan TG, Rosa P.** 2002. Clonal polymorphism of *Borrelia burgdorferi* strain B31 MI: implications for mutagenesis in an infectious strain background. *Infection and immunity* **70**:2139-2150.
2. **Rego RO, Bestor A, Rosa PA.** 2011. Defining the plasmid-borne restriction-modification systems of the Lyme disease spirochete *Borrelia burgdorferi*. *Journal of bacteriology* **193**:1161-1171.
